# Supplementary material for: Nasal microbiota dominated by Moraxella spp. is associated with respiratory health in the elderly population: a case control study
Source: PubMed Central journal article supplement (PMC7362441; doi:10.1186/s12931-020-01443-8), 2020-07-14
Supplement: 12931_2020_1443_MOESM1_ESM.pdf [file 12931_2020_1443_MOESM1_ESM.pdf]

| Scripts used (per sample)                                                             | Extra settings from default                                                                                                                                                                                                                                                                                          | Description                            |
|---------------------------------------------------------------------------------------|----------------------------------------------------------------------------------------------------------------------------------------------------------------------------------------------------------------------------------------------------------------------------------------------------------------------|----------------------------------------|
| Trimmomatic v0.38 (non-Qiime script)                                                  | -threads 12 MINLEN:100                                                                                                                                                                                                                                                                                               | Read length threshold filter           |
| join_paired_ends                                                                      | --perc_max_diff 15                                                                                                                                                                                                                                                                                                   | Merge paired-end NGS data              |
| split_libraries_fastq                                                                 | -q 19 --barcode_type 'not-barcoded'                                                                                                                                                                                                                                                                                  | Quality filter                         |
| pick_open_reference_otus                                                              | <default settings>                                                                                                                                                                                                                                                                                                   | OTU picking (classification)           |
| biom summarize-table                                                                  | <default settings>                                                                                                                                                                                                                                                                                                   | Summarize biom table                   |
| Filter on sample depth based on biom summary (non-Qiime script, custom python script) | Read depth threshold: 5000 reads                                                                                                                                                                                                                                                                                     | Sample depth filtering on mapping file |
| filter_samples_from_otu_table                                                         | --sample_id_fp <filtered mapping file>                                                                                                                                                                                                                                                                               | Sample filtering on biom file          |
| core_diversity_analyses                                                               | -e 8369 -a -O 20 -p <parameters file> for nose dataset<br>-e 6881 -a -O 20 -p <parameters file> for throat dataset<br><br>Core diversity parameters:<br>- alpha_diversity:metrics observed_species,chao1,shannon,PD_whole_tree<br>- beta_diversity:metrics bray_curtis,euclidean,unweighted_unifrac,weighted_unifrac | Alpha & Beta diversity analysis        |
