# Supplementary material for: Nasal microbiota dominated by Moraxella spp. is associated with respiratory health in the elderly population: a case control study
Source: PubMed Central journal article supplement (PMC7362441; doi:10.1186/s12931-020-01443-8), 2020-07-14
Supplement: 12931_2020_1443_MOESM2_ESM.pdf [file 12931_2020_1443_MOESM2_ESM.pdf]

**(a) Nasal passages**

| Controls and patients with an RTI (n = 304)                                       |                              | Controls (n = 152) |                              | Patients with an RTI (n = 152) |                              |
|-----------------------------------------------------------------------------------|------------------------------|--------------------|------------------------------|--------------------------------|------------------------------|
| Top 10 most abundant genera/families (fraction of total reads)                    |                              |                    |                              |                                |                              |
| 1                                                                                 | <i>Corynebacterium</i> (28%) | 1                  | <i>Corynebacterium</i> (29%) | 1                              | <i>Corynebacterium</i> (25%) |
| 2                                                                                 | <i>Staphylococcus</i> (24%)  | 2                  | <i>Staphylococcus</i> (22%)  | 2                              | <i>Staphylococcus</i> (25%)  |
| 3                                                                                 | <i>Moraxella</i> (12%)       | 3                  | <i>Moraxella</i> (13%)       | 3                              | <i>Moraxella</i> (10%)       |
| 4                                                                                 | <i>Dolosigranulum</i> (7%)   | 4                  | <i>Dolosigranulum</i> (8%)   | 4                              | <i>Streptococcus</i> (7%)    |
| 5                                                                                 | <i>Streptococcus</i> (5%)    | 5                  | <i>Peptoniphilus</i> (3%)    | 5                              | <i>Dolosigranulum</i> (7%)   |
| 6                                                                                 | <i>Haemophilus</i> (3%)      | 6                  | <i>Cutibacterium</i> (3%)    | 6                              | <i>Haemophilus</i> (5%)      |
| 7                                                                                 | <i>Peptoniphilus</i> (3%)    | 7                  | <i>Streptococcus</i> (3%)    | 7                              | <i>Peptoniphilus</i> (3%)    |
| 8                                                                                 | <i>Cutibacterium</i> (2%)    | 8                  | <i>Anaerococcus</i> (2%)     | 8                              | Enterobacteriaceae (2%)      |
| 9                                                                                 | <i>Anaerococcus</i> (2%)     | 9                  | <i>Neisseria</i> (2%)        | 9                              | <i>Pseudomonas</i> (2%)      |
| 10                                                                                | Enterobacteriaceae (2%)      | 10                 | <i>Haemophilus</i> (1%)      | 10                             | <i>Prevotella</i> (2%)       |
| Other genera with ≥ 50% relative abundance in at least one swab (number of swabs) |                              |                    |                              |                                |                              |
| 12                                                                                | <i>Pseudomonas</i> (1)       | 11                 | Enterobacteriaceae (1)       |                                |                              |
| 14                                                                                | <i>Neisseria</i> (2)         |                    |                              |                                |                              |

**(b) Oropharynx**

| Controls and patients with an RTI (n = 304)                                       |                            | Controls (n = 152) |                            | Patients with an RTI (n = 152) |                            |
|-----------------------------------------------------------------------------------|----------------------------|--------------------|----------------------------|--------------------------------|----------------------------|
| Top 10 most abundant genera/families (fraction of total reads)                    |                            |                    |                            |                                |                            |
| 1                                                                                 | <i>Prevotella</i> (26%)    | 1                  | <i>Prevotella</i> (27%)    | 1                              | <i>Prevotella</i> (24%)    |
| 2                                                                                 | <i>Veillonella</i> (16%)   | 2                  | <i>Veillonella</i> (16%)   | 2                              | <i>Veillonella</i> (16%)   |
| 3                                                                                 | <i>Streptococcus</i> (11%) | 3                  | <i>Streptococcus</i> (10%) | 3                              | <i>Streptococcus</i> (12%) |
| 4                                                                                 | <i>Neisseria</i> (7%)      | 4                  | <i>Fusobacterium</i> (7%)  | 4                              | <i>Neisseria</i> (7%)      |
| 5                                                                                 | <i>Fusobacterium</i> (6%)  | 5                  | <i>Neisseria</i> (6%)      | 5                              | <i>Leptotrichia</i> (5%)   |
| 6                                                                                 | <i>Leptotrichia</i> (5%)   | 6                  | <i>Leptotrichia</i> (6%)   | 6                              | <i>Haemophilus</i> (4%)    |
| 7                                                                                 | <i>Haemophilus</i> (5%)    | 7                  | <i>Haemophilus</i> (5%)    | 7                              | <i>Fusobacterium</i> (4%)  |
| 8                                                                                 | <i>Rothia</i> (3%)         | 8                  | <i>Porphyromonas</i> (3%)  | 8                              | <i>Rothia</i> (3%)         |
| 9                                                                                 | <i>Porphyromonas</i> (3%)  | 9                  | <i>Actinobacillus</i> (2%) | 9                              | <i>Lactobacillus</i> (3%)  |
| 10                                                                                | <i>Actinobacillus</i> (2%) | 10                 | <i>Rothia</i> (2%)         | 10                             | <i>Actinobacillus</i> (2%) |
| Other genera with ≥ 50% relative abundance in at least one swab (number of swabs) |                            |                    |                            |                                |                            |
| 13                                                                                | <i>Lactobacillus</i> (3)   |                    |                            | 16                             | <i>Staphylococcus</i> (1)  |
| 21                                                                                | <i>Staphylococcus</i> (1)  |                    |                            |                                |                            |
