# Supplementary material for: Nasal microbiota dominated by Moraxella spp. is associated with respiratory health in the elderly population: a case control study
Source: PubMed Central journal article supplement (PMC7362441; doi:10.1186/s12931-020-01443-8), 2020-07-14

**(a) Nasal passages**

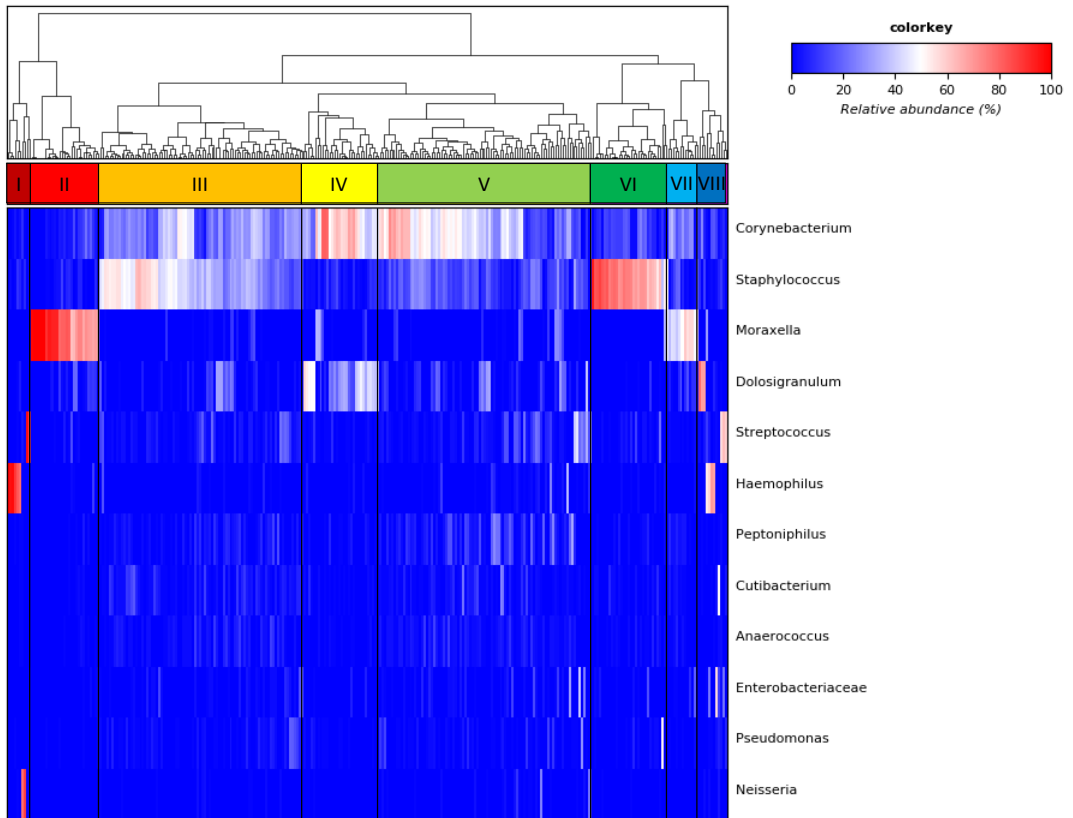

**(b) Oropharynx**

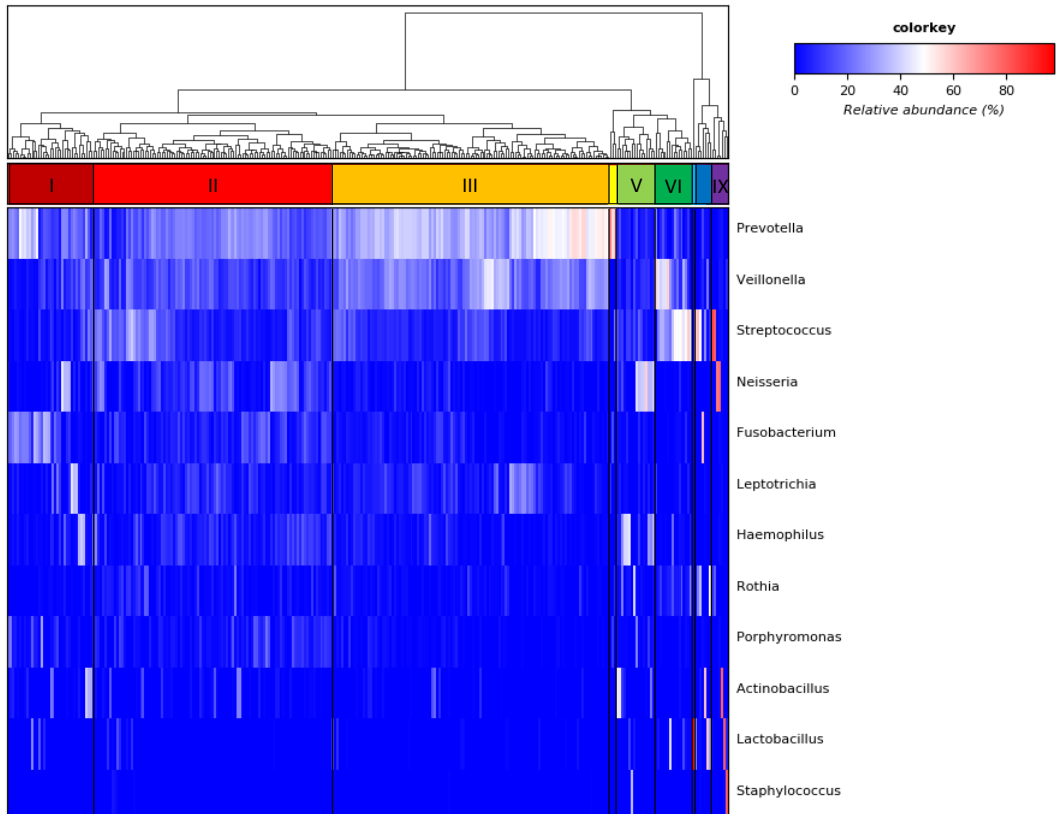

Supplement: 12931_2020_1443_MOESM3_ESM.pdf [file 12931_2020_1443_MOESM3_ESM.pdf]
